# Supplementary material for: Inhibition of PD‐1 Protects against TNBS‐Induced Colitis via Alteration of Enteric Microbiota
Source: Hindawi journal article supplement (doi:10.1155/2021/4192451), 2021-01-01

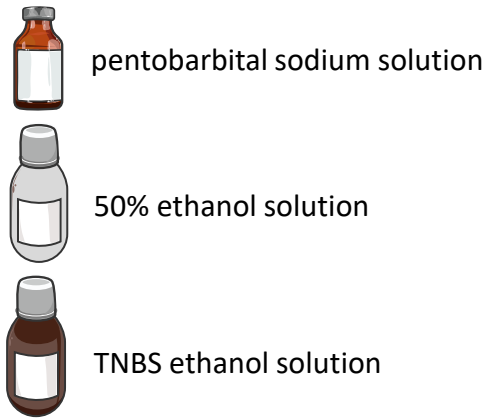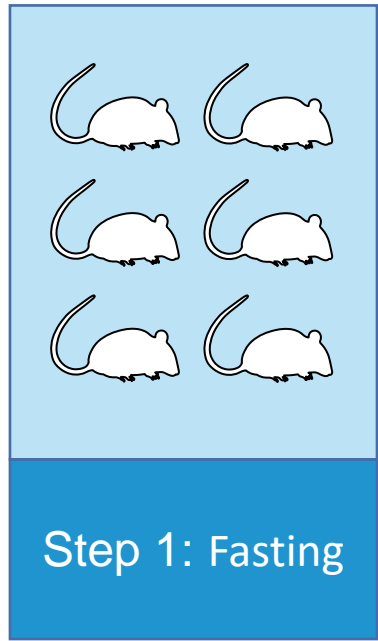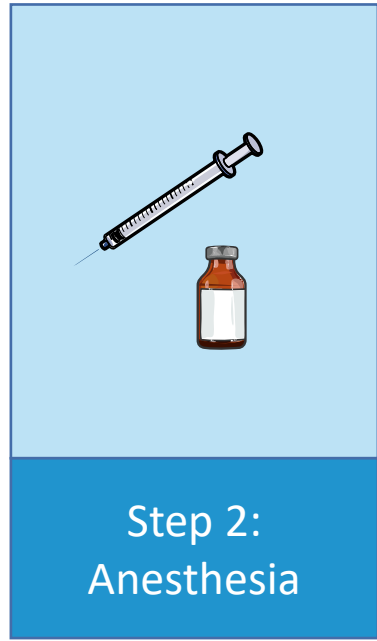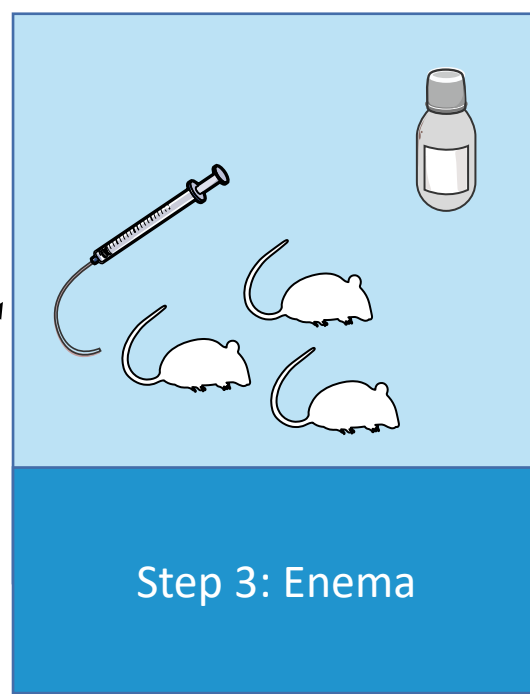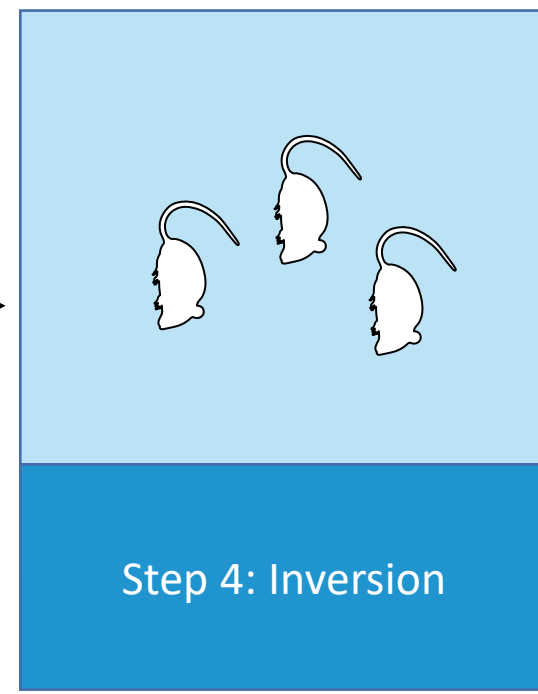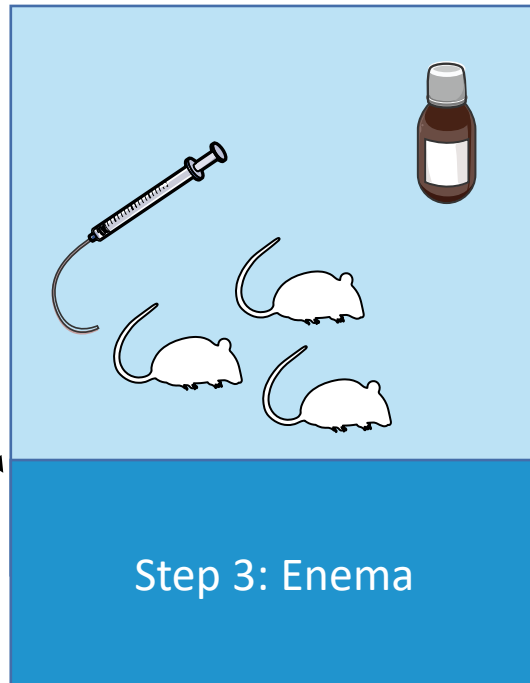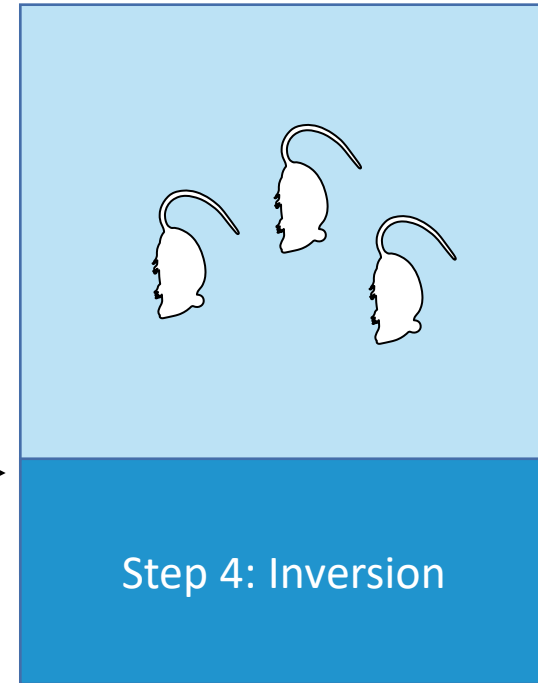

Supplement: f1 [file 4192451.f1.pdf]
